# Supplementary material for: Correlation Analysis of Lignin Accumulation and Expression of Key Genes Involved in Lignin Biosynthesis of Ramie (Boehmeria nivea)
Source: MDPI journal article supplement (doi:10.3390/genes10050389), 2019-05-22
Supplement: s1 [file s1]

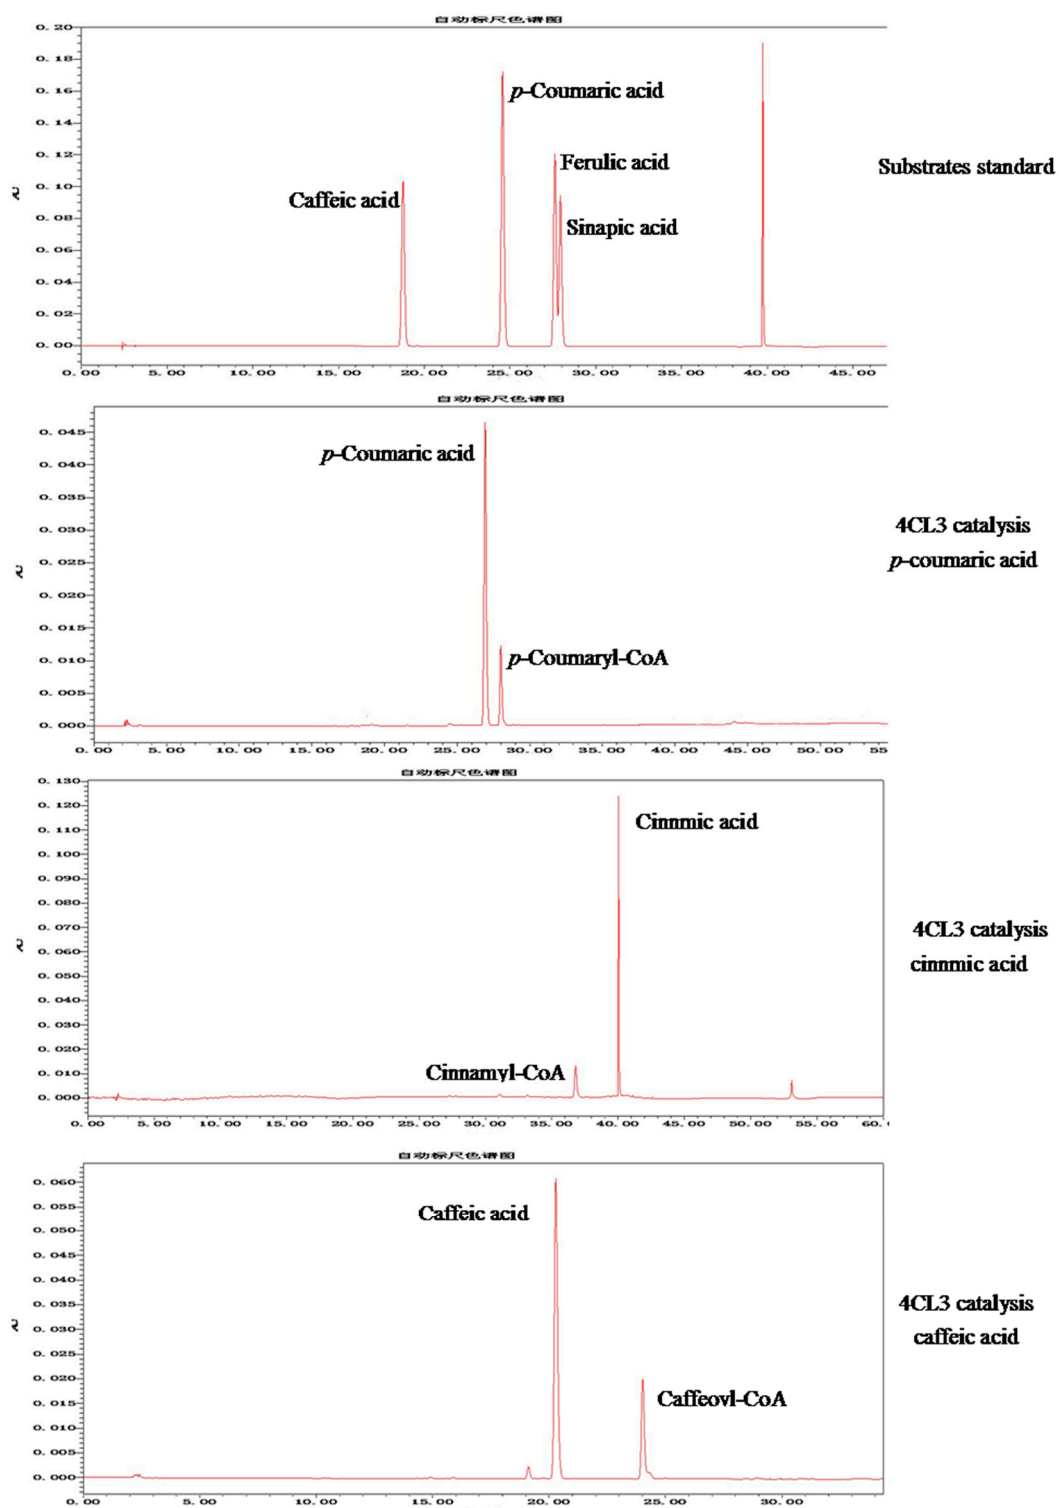

**Figure S1.** HPLC chromatogram of reaction products generated from the recombinant 4CL3 protein catalysis of different substrates.
